# Supplementary material for: Differences in Breast Cancer Survival by Molecular Subtypes in the United States
Source: Oxford University Press journal article supplement (doi:10.1158/1055-9965.epi-17-0627), 2018-03-28
Supplement: 10559965epi170627-sup-185947_3_supp_4626115_p5jk9t.docx [file 10559965epi170627-sup-185947_3_supp_4626115_p5jk9t.docx]

| Supplementary Table 2: Distribution of Breast Cancer Patients with Known vs. Unknown HER2 Status by Demographic and Clinical Factors, SEER-18 Excluding Alaska. 2010-2013. | | | | | | | | |
| --- | --- | --- | --- | --- | --- | --- | --- | --- |
|  |  |  |  |  |  |  |  |  |
|  |  |  |  |  |  |  |  |  |
|  |  |  |  |  |  |  |  |  |
|  | **Count** | | |  | **Percent** | |  | **Overall** |
| ***Demographic characteristics*** | Known | Unknown | Total |  | Known | Unknown |  | **Distribution** |
| **Year of diagnosis** |  |  |  |  |  |  |  |  |
| 2010 | 42,249 | 4,845 | 47,094 |  | 89.7% | 10.3% |  | 24.0% |
| 2011 | 44,704 | 4,319 | 49,023 |  | 91.2% | 8.8% |  | 25.0% |
| 2012 | 45,737 | 3,809 | 49,546 |  | 92.3% | 7.7% |  | 25.3% |
| 2013 | 46,841 | 3,590 | 50,431 |  | 92.9% | 7.1% |  | 25.7% |
| 2010-2013 | 179,531 | 16,563 | 196,094 |  | 91.6% | 8.4% |  | 100.0% |
|  |  |  |  |  |  |  |  |  |
| **Age at diagnosis** |  |  |  |  |  |  |  |  |
| 0-34 years | 3,936 | 325 | 4,261 |  | 92.4% | 7.6% |  | 2.2% |
| 35-39 years | 5,893 | 442 | 6,335 |  | 93.0% | 7.0% |  | 3.2% |
| 40-44 years | 12,330 | 960 | 13,290 |  | 92.8% | 7.2% |  | 6.8% |
| 45-49 years | 19,240 | 1,522 | 20,762 |  | 92.7% | 7.3% |  | 10.6% |
| 50-54 years | 22,459 | 1,760 | 24,219 |  | 92.7% | 7.3% |  | 12.4% |
| 55-59 years | 22,922 | 1,982 | 24,904 |  | 92.0% | 8.0% |  | 12.7% |
| 60-64 years | 24,592 | 2,073 | 26,665 |  | 92.2% | 7.8% |  | 13.6% |
| 65-69 years | 22,535 | 1,960 | 24,495 |  | 92.0% | 8.0% |  | 12.5% |
| 70-74 years | 16,714 | 1,504 | 18,218 |  | 91.7% | 8.3% |  | 9.3% |
| 75-79 years | 12,561 | 1,248 | 13,809 |  | 91.0% | 9.0% |  | 7.0% |
| 80-84 years | 8,950 | 1,119 | 10,069 |  | 88.9% | 11.1% |  | 5.1% |
| 85+ years | 7,399 | 1,668 | 9,067 |  | 81.6% | 18.4% |  | 4.6% |
|  |  |  |  |  |  |  |  |  |
| **% Poverty 2010 (county level)** |  |  |  |  |  |  |  |  |
| High SES (poverty <10%) | 28,860 | 2,510 | 31,370 |  | 92.0% | 8.0% |  | 16.0% |
| Medium SES (poverty 10%-19.99%) | 125,018 | 11,594 | 136,612 |  | 91.5% | 8.5% |  | 69.7% |
| Low SES (poverty > 20%) | 25,620 | 2,445 | 28,065 |  | 91.3% | 8.7% |  | 14.3% |
| Unknown | 33 | 14 | 47 |  | 70.2% | 29.8% |  | 0.02% |
|  |  |  |  |  |  |  |  |  |
| **% Urban 2010 (county level)** |  |  |  |  |  |  |  |  |
| Less Urban ( < 50%) | 13,158 | 1,428 | 14,586 |  | 90.2% | 9.8% |  | 7.4% |
| More Urban ( ≥ 50%) | 166,340 | 15,121 | 181,461 |  | 91.7% | 8.3% |  | 92.6% |
| Unknown | 33 | 14 | 47 |  | 70.2% | 29.8% |  | 0.02% |
|  |  |  |  |  |  |  |  |  |
| **Race** |  |  |  |  |  |  |  |  |
| White | 141,831 | 12,740 | 154,571 |  | 91.8% | 8.2% |  | 78.8% |
| Black | 20,078 | 2,029 | 22,107 |  | 90.8% | 9.2% |  | 11.3% |
| API | 15,521 | 1,409 | 16,930 |  | 91.7% | 8.3% |  | 8.6% |
| Unknown | 1,239 | 306 | 1,545 |  | 80.2% | 19.8% |  | 0.8% |
|  |  |  |  |  |  |  |  |  |
| **Ethnicity** |  |  |  |  |  |  |  |  |
| Non-Hispanic | 159,302 | 14,499 | 173,801 |  | 91.7% | 8.3% |  | 88.6% |
| Hispanic | 20,229 | 2,064 | 22,293 |  | 90.7% | 9.3% |  | 11.4% |
|  |  |  |  |  |  |  |  |  |
| **Registry** |  |  |  |  |  |  |  |  |
| San Francisco/Oakland | 9,770 | 700 | 10,470 |  | 93.3% | 6.7% |  | 5.3% |
| Connecticut | 9,005 | 700 | 9,705 |  | 92.8% | 7.2% |  | 4.9% |
| Detroit (metropolitan) | 9,234 | 619 | 9,853 |  | 93.7% | 6.3% |  | 5.0% |
| Hawaii | 3,412 | 170 | 3,582 |  | 95.3% | 4.7% |  | 1.8% |
| Iowa | 6,742 | 415 | 7,157 |  | 94.2% | 5.8% |  | 3.6% |
| New Mexico | 3,768 | 661 | 4,429 |  | 85.1% | 14.9% |  | 2.3% |
| Seattle (Puget Sound) | 11,121 | 450 | 11,571 |  | 96.1% | 3.9% |  | 5.9% |
| Utah | 4,268 | 270 | 4,538 |  | 94.1% | 5.9% |  | 2.3% |
| Atlanta (metropolitan) | 6,930 | 620 | 7,550 |  | 91.8% | 8.2% |  | 3.9% |
| San Jose/Monterey | 5,028 | 351 | 5,379 |  | 93.5% | 6.5% |  | 2.7% |
| Los Angeles | 17,913 | 1,858 | 19,771 |  | 90.6% | 9.4% |  | 10.1% |
| Rural+Greater Georgia | 13,047 | 1,142 | 14,189 |  | 92.0% | 8.0% |  | 7.2% |
| Greater California | 39,840 | 4,361 | 44,201 |  | 90.1% | 9.9% |  | 22.5% |
| Kentucky | 9,601 | 900 | 10,501 |  | 91.4% | 8.6% |  | 5.4% |
| Louisiana | 9,663 | 955 | 10,618 |  | 91.0% | 9.0% |  | 5.4% |
| New Jersey | 20,189 | 2,391 | 22,580 |  | 89.4% | 10.6% |  | 11.5% |
|  |  |  |  |  |  |  |  |  |
| **Reporting Source** |  |  |  |  |  |  |  |  |
| Hospital inpatient/outpatient | 169,936 | 14,758 | 184,694 |  | 92.0% | 8.0% |  | 94.2% |
| Radiation facitlities | 1,898 | 141 | 2,039 |  | 93.1% | 6.9% |  | 1.0% |
| Laboratory only | 1,464 | 432 | 1,896 |  | 77.2% | 22.8% |  | 1.0% |
| Physicians office | 1,164 | 733 | 1,897 |  | 61.4% | 38.6% |  | 1.0% |
| Other hospital outpatient unit | 5,061 | 381 | 5,442 |  | 93.0% | 7.0% |  | 2.8% |
|  |  |  |  |  |  |  |  |  |
| **Marital Status** |  |  |  |  |  |  |  |  |
| Single | 26,524 | 2,664 | 29,188 |  | 90.9% | 9.1% |  | 14.9% |
| Married | 98,419 | 7,536 | 105,955 |  | 92.9% | 7.1% |  | 54.1% |
| Separated | 1,853 | 187 | 2,040 |  | 90.8% | 9.2% |  | 1.0% |
| Divorced | 19,081 | 1,567 | 20,648 |  | 92.4% | 7.6% |  | 10.6% |
| Widowed | 23,516 | 2,875 | 26,391 |  | 89.1% | 10.9% |  | 13.5% |
| Unknown | 9,737 | 1,711 | 11,448 |  | 85.1% | 14.9% |  | 5.9% |
|  |  |  |  |  |  |  |  |  |
| **Insurance** |  |  |  |  |  |  |  |  |
| Uninsured | 3,560 | 502 | 4,062 |  | 87.6% | 12.4% |  | 2.1% |
| Any Medicaid | 21,039 | 2,128 | 23,167 |  | 90.8% | 9.2% |  | 11.8% |
| Insured | 128,156 | 9,824 | 137,980 |  | 92.9% | 7.1% |  | 70.4% |
| Insured/No Specifics | 23,570 | 2,638 | 26,208 |  | 89.9% | 10.1% |  | 13.4% |
| Unknown | 3,206 | 1,471 | 4,677 |  | 68.5% | 31.5% |  | 2.4% |
|  |  |  |  |  |  |  |  |  |
| ***Clinical characteristics*** |  |  |  |  |  |  |  |  |
| **ER Status** |  |  |  |  |  |  |  |  |
| Positive | 147,597 | 7,487 | 155,084 |  | 95.2% | 4.8% |  | 79.1% |
| Negative | 31,506 | 1,539 | 33,045 |  | 95.3% | 4.7% |  | 16.9% |
| Unknown | 428 | 7,537 | 7,965 |  | 5.4% | 94.6% |  | 4.1% |
|  |  |  |  |  |  |  |  |  |
| **PR Status** |  |  |  |  |  |  |  |  |
| Positive | 128,312 | 6,240 | 134,552 |  | 95.4% | 4.6% |  | 68.6% |
| Negative | 50,250 | 2,529 | 52,779 |  | 95.2% | 4.8% |  | 26.9% |
| Unknown | 969 | 7,794 | 8,763 |  | 11.1% | 88.9% |  | 4.5% |
|  |  |  |  |  |  |  |  |  |
| **Bloom Richardson grade** |  |  |  |  |  |  |  |  |
| Low | 41,576 | 2,456 | 44,032 |  | 94.4% | 5.6% |  | 22.5% |
| Medium | 69,010 | 3,871 | 72,881 |  | 94.7% | 5.3% |  | 37.2% |
| High | 49,338 | 2,695 | 52,033 |  | 94.8% | 5.2% |  | 26.5% |
| Unknown | 19,607 | 7,541 | 27,148 |  | 72.2% | 27.8% |  | 13.8% |
|  |  |  |  |  |  |  |  |  |
| **Histology** |  |  |  |  |  |  |  |  |
| Ductal | 136,451 | 10,465 | 146,916 |  | 92.9% | 7.1% |  | 74.9% |
| Lobular | 16,164 | 1,046 | 17,210 |  | 93.9% | 6.1% |  | 8.8% |
| Mixed | 16,396 | 945 | 17,341 |  | 94.6% | 5.4% |  | 8.8% |
| Other | 9,251 | 3,018 | 12,269 |  | 75.4% | 24.6% |  | 6.3% |
| Unknown | 1,269 | 1,089 | 2,358 |  | 53.8% | 46.2% |  | 1.2% |
|  |  |  |  |  |  |  |  |  |
| **Survival time (month)** |  |  |  |  |  |  |  |  |
| 0 - 6 | 6,924 | 2,232 | 9,156 |  | 75.6% | 24.4% |  | 4.7% |
| > 6- 12 | 9,537 | 1,037 | 10,574 |  | 90.2% | 9.8% |  | 5.4% |
| > 12 - 18 | 24,978 | 1,932 | 26,910 |  | 92.8% | 7.2% |  | 13.7% |
| > 18 - 24 | 22,952 | 1,658 | 24,610 |  | 93.3% | 6.7% |  | 12.6% |
| > 24 - 30 | 22,666 | 1,741 | 24,407 |  | 92.9% | 7.1% |  | 12.4% |
| > 30 - 36 | 22,109 | 1,658 | 23,767 |  | 93.0% | 7.0% |  | 12.1% |
| > 36 - 42 | 20,625 | 1,689 | 22,314 |  | 92.4% | 7.6% |  | 11.4% |
| > 42 - 48 | 19,286 | 1,677 | 20,963 |  | 92.0% | 8.0% |  | 10.7% |
| > 48 - 54 | 17,666 | 1,704 | 19,370 |  | 91.2% | 8.8% |  | 9.9% |
| > 54 - 60 | 12,788 | 1,235 | 14,023 |  | 91.2% | 8.8% |  | 7.2% |
|  |  |  |  |  |  |  |  |  |
| **Vital Status** |  |  |  |  |  |  |  |  |
| Dead | 17,106 | 3,729 | 20,835 |  | 82.1% | 17.9% |  | 10.6% |
| Alive | 162,425 | 12,834 | 175,259 |  | 92.7% | 7.3% |  | 89.4% |
|  |  |  |  |  |  |  |  |  |
| **Surgery** |  |  |  |  |  |  |  |  |
| Yes | 165,258 | 11,879 | 177,137 |  | 93.3% | 6.7% |  | 90.3% |
| No | 13,950 | 4,356 | 18,306 |  | 76.2% | 23.8% |  | 9.3% |
| Unknown | 323 | 328 | 651 |  | 49.6% | 50.4% |  | 0.3% |
|  |  |  |  |  |  |  |  |  |
| **AJCC 7th Stage** |  |  |  |  |  |  |  |  |
| I | 86,189 | 6,452 | 92,641 |  | 93.0% | 7.0% |  | 47.3% |
| II | 59,284 | 3,621 | 62,905 |  | 94.2% | 5.8% |  | 32.1% |
| III | 21,122 | 1,298 | 22,420 |  | 94.2% | 5.8% |  | 11.5% |
| IV | 9,314 | 1,826 | 11,140 |  | 83.6% | 16.4% |  | 5.7% |
| Unknown | 3,550 | 3,058 | 6,608 |  | 53.7% | 46.3% |  | 3.4% |
|  |  |  |  |  |  |  |  |  |
| **Tumor size** |  |  |  |  |  |  |  |  |
| upto 1 cm | 42,609 | 4,219 | 46,828 |  | 91.0% | 9.0% |  | 23.9% |
| >1 to 2 cm | 59,623 | 3,404 | 63,027 |  | 94.6% | 5.4% |  | 32.2% |
| >2 to 3 cm | 34,389 | 2,109 | 36,498 |  | 94.2% | 5.8% |  | 18.6% |
| >3 to 4 cm | 15,030 | 1,003 | 16,033 |  | 93.7% | 6.3% |  | 8.2% |
| >4 to 5 cm | 8,021 | 672 | 8,693 |  | 92.3% | 7.7% |  | 4.4% |
| > 5+ cm | 14,784 | 1,401 | 16,185 |  | 91.3% | 8.7% |  | 8.3% |
| unknown | 5,075 | 3,755 | 8,830 |  | 57.5% | 42.5% |  | 4.5% |
| HER2 status: positive = positive; negative = negative; unknown = borderline + unknown codes (997, 998, 999) | | | | | |  |  |  |
| ER status: positive = positive + borderline; negative = negative; unknown = unknown codes (997, 998, 999) | | | | | |  |  |  |
| PR status: positive = positive + borderline; negative = negative; unknown = unknown codes (997, 998, 999) | | | | | |  |  |  |
