# Supplementary material for: Differences in Breast Cancer Survival by Molecular Subtypes in the United States
Source: Oxford University Press journal article supplement (doi:10.1158/1055-9965.epi-17-0627), 2018-03-28
Supplement: 10559965epi170627-sup-185947_3_supp_4626116_p5lhr9.docx [file 10559965epi170627-sup-185947_3_supp_4626116_p5lhr9.docx]

| Supplementary Table 3: Four-year Breast Cancer-specific Survival by Molecular Subtypes, Demographic, and Clinical Factors Using Imputed Dataset, SEER-18 excluding Alaska. 2010-2013. | | | | | | | | | | | | | | | | | | | |
| --- | --- | --- | --- | --- | --- | --- | --- | --- | --- | --- | --- | --- | --- | --- | --- | --- | --- | --- | --- |
|  | **HR+/HER2-** | | | |  | **Triple Negative** | | | |  | **HR+/HER2+** | | | |  | **HR-/HER2+** | | | |
|  | **N** | **Survival %** | **95% CI** | |  | **N** | **Survival %** | **95% CI** | |  | **N** | **Survival %** | **95% CI** | |  | **N** | **Survival %** | **95% CI** | |
| ***Demographic Characteristics*** |  |  |  |  |  |  |  |  |  |  |  |  |  |  |  |  |  |  |  |
| **Age at diagnosis** |  |  |  |  |  |  |  |  |  |  |  |  |  |  |  |  |  |  |  |
| <50 | 29085 | 93.9 | 93.5 | 94.3 |  | 6594 | 79.5 | 78.2 | 80.8 |  | 6411 | 94.1 | 93.3 | 95.0 |  | 2558 | 86.4 | 84.5 | 88.4 |
| 50-64 | 54000 | 94.0 | 93.7 | 94.3 |  | 9220 | 79.2 | 78.1 | 80.3 |  | 8471 | 90.8 | 90.0 | 91.7 |  | 4097 | 85.4 | 83.8 | 86.9 |
| 65-74 | 33479 | 93.6 | 93.3 | 94.0 |  | 4252 | 79.4 | 77.9 | 81.0 |  | 3471 | 89.3 | 87.8 | 90.7 |  | 1511 | 82.5 | 79.9 | 85.1 |
| 75+ | 26003 | 86.5 | 85.9 | 87.1 |  | 3392 | 63.1 | 60.9 | 65.4 |  | 2453 | 79.5 | 77.3 | 81.8 |  | 1098 | 63.3 | 59.0 | 67.6 |
| **Race/Ethnicity** |  |  |  |  |  |  |  |  |  |  |  |  |  |  |  |  |  |  |  |
| NH White | 101102 | 93 | 92.8 | 93.3 |  | 14206 | 78.2 | 77.3 | 79.1 |  | 13410 | 90.9 | 90.2 | 91.6 |  | 5466 | 82.8 | 81.3 | 84.2 |
| NH Black | 13453 | 87.6 | 86.8 | 88.4 |  | 4653 | 71.7 | 70.0 | 73.4 |  | 2508 | 85.6 | 83.7 | 87.4 |  | 1296 | 76.2 | 72.9 | 79.5 |
| NH API | 11930 | 94.8 | 94.3 | 95.4 |  | 1627 | 82.1 | 79.6 | 84.6 |  | 2106 | 92.5 | 90.8 | 94.2 |  | 1158 | 88.5 | 85.9 | 91.1 |
| Hispanic | 15472 | 91.8 | 91.1 | 92.4 |  | 2856 | 77.6 | 75.5 | 79.7 |  | 2670 | 90.1 | 88.4 | 91.9 |  | 1295 | 84.4 | 81.5 | 87.2 |
| **Poverty 2010**d (county level) |  |  |  |  |  |  |  |  |  |  |  |  |  |  |  |  |  |  |  |
| High SES | 23486 | 93.8 | 93.4 | 94.2 |  | 3229 | 80.9 | 79 | 82.7 |  | 3169 | 91.7 | 90.3 | 93.1 |  | 1440 | 85.9 | 83.4 | 88.5 |
| Medium SES | 99571 | 92.6 | 92.4 | 92.8 |  | 16055 | 76.9 | 76 | 77.8 |  | 14479 | 90.5 | 89.9 | 91.2 |  | 6375 | 83.5 | 82.1 | 84.8 |
| Low SES | 19509 | 90.8 | 90.2 | 91.3 |  | 4174 | 74.9 | 73.2 | 76.7 |  | 3159 | 88.0 | 86.5 | 89.6 |  | 1448 | 76.6 | 73.5 | 79.6 |
| **Urban 2010**d (county level) |  |  |  |  |  |  |  |  |  |  |  |  |  |  |  |  |  |  |  |
| Less Urban | 10316 | 91.5 | 90.8 | 92.2 |  | 2012 | 74 | 71.5 | 76.6 |  | 1580 | 87.7 | 85.5 | 89.9 |  | 683 | 77.1 | 72.9 | 81.4 |
| More Urban | 132250 | 92.6 | 92.4 | 92.8 |  | 21446 | 77.4 | 76.6 | 78.1 |  | 19226 | 90.5 | 90.0 | 91.1 |  | 8581 | 83.2 | 82.1 | 84.4 |
| **Insurance Status** |  |  |  |  |  |  |  |  |  |  |  |  |  |  |  |  |  |  |  |
| Uninsured | 2653 | 83.2 | 81.0 | 85.3 |  | 687 | 62.5 | 57.4 | 67.6 |  | 546 | 83.4 | 78.6 | 88.1 |  | 270 | 70 | 61.1 | 79 |
| Any Medicaid | 15749 | 87.1 | 86.3 | 87.8 |  | 3565 | 67.7 | 65.6 | 69.8 |  | 2905 | 83.4 | 81.4 | 85.3 |  | 1510 | 74.3 | 71.1 | 77.5 |
| Insured | 104404 | 93.9 | 93.7 | 94.1 |  | 16047 | 80.2 | 79.4 | 81.1 |  | 14608 | 92.5 | 91.9 | 93.1 |  | 6289 | 85.4 | 84.1 | 86.7 |
| Insured, NOS | 19761 | 90.6 | 90.0 | 91.2 |  | 3160 | 74.4 | 72.5 | 76.4 |  | 2747 | 86.9 | 85.1 | 88.7 |  | 1195 | 81.3 | 78.5 | 84.2 |
| **Marital Status** |  |  |  |  |  |  |  |  |  |  |  |  |  |  |  |  |  |  |  |
| Single | 21503 | 89.9 | 89.4 | 90.5 |  | 4216 | 71.2 | 69.3 | 73 |  | 3724 | 87.1 | 85.5 | 88.7 |  | 1591 | 76.6 | 73.5 | 79.8 |
| Married/partnered/separated | 121063 | 93 | 92.8 | 93.2 |  | 19242 | 78.4 | 77.6 | 79.2 |  | 17082 | 91.0 | 90.4 | 91.6 |  | 7673 | 84 | 82.8 | 85.1 |
| ***Clinical Characteristics*** |  |  |  |  |  |  |  |  |  |  |  |  |  |  |  |  |  |  |  |
| **AJCC Stage 7** |  |  |  | |  |  |  |  | |  |  |  |  | |  |  |  |  | |
| Stage I | 75866 | 98.9 | 98.7 | 99 |  | 7966 | 95.1 | 94.5 | 95.8 |  | 7918 | 98.6 | 98.3 | 99 |  | 2949 | 96.9 | 95.9 | 97.8 |
| Stage II | 44464 | 94.7 | 94.4 | 95 |  | 9902 | 83.8 | 82.7 | 84.8 |  | 7634 | 95.4 | 94.7 | 96.1 |  | 3293 | 90.5 | 89 | 91.9 |
| Stage III | 14806 | 82.0 | 81.1 | 82.9 |  | 3728 | 53.4 | 51.2 | 55.6 |  | 3299 | 84.4 | 82.7 | 86.2 |  | 1931 | 74.5 | 71.8 | 77.3 |
| Stage IV | 7430 | 35.9 | 34.3 | 37.6 |  | 1862 | 11.2 | 9.0 | 13.4 |  | 1955 | 45.5 | 42.0 | 49 |  | 1090 | 33.9 | 29.6 | 38.3 |
| **Bloom Richardson Grade** |  |  |  | |  |  |  |  | |  |  |  |  | |  |  |  |  | |
| Low | 46730 | 96.6 | 96.4 | 96.9 |  | 1241 | 82.2 | 79.3 | 85.1 |  | 2084 | 94.9 | 93.3 | 96.4 |  | 407 | 89.1 | 84.9 | 93.2 |
| Medium | 68646 | 93.1 | 92.8 | 93.4 |  | 4629 | 80.2 | 78.6 | 81.9 |  | 8641 | 91.9 | 91.0 | 92.7 |  | 2075 | 86.9 | 84.9 | 89.0 |
| High | 27189 | 84.0 | 83.4 | 84.7 |  | 17588 | 75.9 | 75.0 | 76.7 |  | 10081 | 87.9 | 87.0 | 88.9 |  | 6782 | 81.1 | 79.7 | 82.4 |
| **Nodal status** |  |  |  |  |  |  |  |  |  |  |  |  |  |  |  |  |  |  |  |
| Negative | 98023 | 96.3 | 96.1 | 96.5 |  | 14836 | 87.6 | 86.9 | 88.4 |  | 11865 | 95.3 | 94.7 | 95.9 |  | 4851 | 91.1 | 89.9 | 92.3 |
| Positive | 44543 | 84.4 | 84.0 | 84.9 |  | 8623 | 59.1 | 57.6 | 60.5 |  | 8941 | 83.7 | 82.6 | 84.7 |  | 4413 | 73.6 | 71.7 | 75.5 |
